# Supplementary material
Source: HighWire-hosted journal article supplement (https://www.qdcxjkg.com/highwire/filestream/113583/field_highwire_adjunct_files/0/Online_Supplement_revision_unmarked.pdf)
Supplement: Online_Supplement_revision_unmarked.pdf [file Online_Supplement_revision_unmarked.pdf]

## **Online Supplement**

### ***Aspergillus fumigatus* during stable state and exacerbations of chronic obstructive pulmonary disease**

Mona Bafadhel, Susan Mckenna, Joshua Agbetile, Abbie Fairs, Dhananjay Desai, Vijay Mistry, Joseph P Morley, Mitesh Pancholi, Ian D Pavord, Andrew J Wardlaw, Catherine H Pashley\*, Christopher E Brightling\*

**Table E1;** Identification and incidence of non *A. fumigatus* filamentous fungi cultured from the sputum of patients with COPD at stable state or during an exacerbation event. Isolates were either the only filamentous fungi cultured (mono), grew in co-culture with *A. fumigatus* (co-Af), or in co-culture with other filamentous fungi listed but not *A. fumigatus* (co-other).

| Genus               | Species/taxonomic identifier              | Stable |       |          | Exacerbation |       |          |
|---------------------|-------------------------------------------|--------|-------|----------|--------------|-------|----------|
|                     |                                           | Mono   | co-Af | co-other | Mono         | co-Af | co-other |
| <i>Aspergillus</i>  | <i>A. niger</i>                           | 7      | 5     | 1        | 5            | 4     |          |
|                     | <i>A. terreus</i>                         |        | 1     | 1        |              |       |          |
|                     | <i>A. hiratsukae</i>                      | 1      |       |          |              |       |          |
|                     | section Nidulantes (species undetermined) | 2      | 2     |          | 2            | 2     |          |
|                     | section Flavi (species undetermined)      | 1      |       |          |              |       |          |
|                     | species undetermined                      | 2      | 2     | 1        | 1            |       |          |
| <i>Penicillium</i>  | <i>P. capsulatum</i> ,                    | 1      |       |          |              |       |          |
|                     | <i>P. diversum</i>                        | 1      |       |          |              |       |          |
|                     | <i>P. piceum</i>                          | 6      | 3     | 1        | 3            | 1     |          |
|                     | species undetermined                      | 1      | 2     |          | 1            | 1     |          |
| <i>Paecilomyces</i> | species undetermined                      | 1      | 2     |          |              |       |          |
| <i>Fusarium</i>     | <i>F. dimerum</i>                         | 1      |       |          |              |       |          |
| <i>Rhizopus</i>     | <i>R. arrhizus</i>                        | 1      |       |          |              |       |          |
| Zygomycete          | genus & species undetermined              |        | 3     |          |              |       |          |
| <i>Lichtheimia</i>  | <i>L. ramosa</i>                          |        |       |          |              | 1     |          |
| <i>Hyphodontia</i>  | <i>H. palmae</i>                          | 1      |       |          |              |       |          |
|                     | mould, not further classified             | 3      |       |          |              |       |          |

**Table E2;** Change in airway physiology, and health status in patients with COPD that acquire or do not acquire a fungus, in patients with bacteria associated exacerbation

| <b>Bacteria associated exacerbations</b>  |                                                |                                                             |                                                                   |                                                |         |
|-------------------------------------------|------------------------------------------------|-------------------------------------------------------------|-------------------------------------------------------------------|------------------------------------------------|---------|
|                                           | Acquisition of<br><i>Aspergillus fumigatus</i> | No <i>Aspergillus fumigatus</i><br>detected at either visit | <i>Aspergillus</i><br><i>fumigatus</i> detected at<br>both visits | Loss of <i>Aspergillus</i><br><i>fumigatus</i> | p-value |
| $\Delta$ FEV <sub>1</sub> , L             | -0.15 (-0.38 to 0.08)                          | -0.17 (-0.25 to -0.09)                                      | -0.32 (-0.69 to 0.06)                                             | -0.19 (-0.31 to -0.08)                         | 0.69    |
| $\Delta$ FEV <sub>1</sub> % predicted     | -14 (-35 to 8)                                 | -14 (-20 to -8)                                             | -20 (-37 to -4)                                                   | -14 (-23 to -5)                                | 0.83    |
| $\Delta$ CRQ <sub>total</sub>             | -0.9 (-1.9 to 0.0)                             | -0.8 (-1.1 to -0.4)                                         | -0.4 (-1.0 to 0.2)                                                | -0.6 (-1.1 to -0.1)                            | 0.66    |
| $\Delta$ VAS <sub>cough</sub>             | 39 (29 to 50)                                  | 23 (10 to 36)                                               | 15 (0 to 31)                                                      | 20 (-1 to 41)                                  | 0.68    |
| $\Delta$ VAS <sub>dyspnoea</sub>          | 35 (19 to 51)                                  | 17 (6 to 27)                                                | 7 (-12 to 27)                                                     | 18 (6 to 30)                                   | 0.37    |
| $\Delta$ VAS <sub>sputum production</sub> | 22 (-10 to 53)                                 | 21 (9 to 34)                                                | 21 (9 to 33)                                                      | 23 (10 to 35)                                  | 0.99    |
| $\Delta$ VAS <sub>sputum purulence</sub>  | 28 (-25 to 82)                                 | 30 (17 to 43)                                               | 28 (9 to 47)                                                      | 28 (11 to 44)                                  | 0.99    |

Data presented as mean change (95% confidence interval) unless stated. ¶ geometric mean (95% confidence interval).  $\Delta$  change from baseline.; FEV<sub>1</sub> Forced expiratory volume in 1 second; CRQ Chronic respiratory health questionnaire; VAS Visual analogue scale;

**Table E3;** Change in airway physiology, health status and airway inflammation in patients with COPD that acquire or do not acquire a fungus, in exacerbations not associated with bacteria

| <b>Non bacteria associated exacerbations</b> |                                                          |                                                                       |                                                                   |                                                |         |
|----------------------------------------------|----------------------------------------------------------|-----------------------------------------------------------------------|-------------------------------------------------------------------|------------------------------------------------|---------|
|                                              | Acquisition of<br><i>Aspergillus</i><br><i>fumigatus</i> | No <i>Aspergillus</i><br><i>fumigatus</i> detected at<br>either visit | <i>Aspergillus</i><br><i>fumigatus</i> detected at<br>both visits | Loss of <i>Aspergillus</i><br><i>fumigatus</i> | p-value |
| Δ FEV <sub>1</sub>                           | -0.06 (-0.18 to 0.04)                                    | -0.30 (-0.43 to -0.17)                                                | -0.26 (-0.71 to 0.19)                                             | -0.11 (-0.25 to 0.02)                          | 0.31    |
| Δ FEV <sub>1</sub> % predicted               | -4 (-13 to 7)                                            | -20 (-28 to -12)                                                      | -18 (-45 to 10)                                                   | -14 (-36 to 7)                                 | 0.40    |
| Δ CRQ <sub>total</sub>                       | -0.8 (-1.8 to 0.1)                                       | -0.7 (-1.1 to -0.3)                                                   | -1.0 (-2.1 to 0.2)                                                | -0.8 (-1.3 to -0.3)                            | 0.94    |
| Δ VAS <sub>cough</sub>                       | 36 (18 to 54)                                            | 25 (13 to 37)                                                         | 35 (-14 to 83)                                                    | 28 (-2 to 58)                                  | 0.80    |
| Δ VAS <sub>dyspnoea</sub>                    | 23 (2 to 44)                                             | 26 (16 to 35)                                                         | 39 (-39 to 116)                                                   | 23 (13 to 33)                                  | 0.87    |
| Δ VAS <sub>sputum production</sub>           | 11 (-22 to 43)                                           | 11 (2 to 24)                                                          | 66 (58 to 74)                                                     | 36 (3 to 69)                                   | 0.13    |
| Δ VAS <sub>sputum purulence</sub>            | 40 (10 to 71)                                            | 5 (-9 to 19)                                                          | 4 (-7 to 99)                                                      | 21 (-2 to 44)                                  | 0.15    |

Data presented as mean (standard error of the mean) unless stated. ‡ median (interquartile range); ¶ geometric mean (95% confidence interval). Δ change from baseline; FEV<sub>1</sub> Forced expiratory volume in 1 second; CRQ Chronic respiratory health questionnaire; VAS Visual analogue score; † post bronchodilator
